# Supplementary material for: Determination of phenolic compounds in estuary water and sediment by solid-phase isotope dansylation coupled with liquid chromatography-high resolution mass spectrometry
Source: Royal Society of Chemistry journal article supplement (doi:10.1039/d1ay00079a), 2021-01-01
Supplement: d1ay00079a1.pdf [file d1ay00079a1.pdf]

1

## Supporting Information

2

3 **Determination of phenolic compounds in estuary water and**  
4 **sediment by solid-phase isotope dansylation coupled with**  
5 **liquid chromatography-high resolution mass spectrometry**

6 Wenxue Xu, Yufeng Hu, Minghuo Wu\*, Enming Miao, Hao Zhou, Xuwang Zhang,

7 Jingjing Zhan\*

8 School of Ocean Science and Technology, Dalian University of Technology, Panjin

9 124221, China

10

11

12 \*Corresponding authors:

13 Dr. Minghuo Wu

14 Email: [wumh@dlut.edu.cn](mailto:wumh@dlut.edu.cn), Tel: +86-427-2631788

15 Dr. Jingjing Zhan

16 Email: [jingjingzhan@dlut.edu.cn](mailto:jingjingzhan@dlut.edu.cn), Tel: +86-427-2631789

Table S1. Structure and theoretical mass-to-charge ratio (m/z) of the phenols.

| Analyte  | Structure                                                                           | Theoretical m/z                  |                                  |                                  |
|----------|-------------------------------------------------------------------------------------|----------------------------------|----------------------------------|----------------------------------|
|          |                                                                                     | Un-labeled<br>[M-H] <sup>-</sup> | D0-labeled<br>[M+H] <sup>+</sup> | D6-labeled<br>[M+H] <sup>+</sup> |
| phenol   | 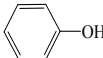   | 93.03459                         | 328.10019                        | 334.13785                        |
| resorcin |    | 109.0295                         | 344.09511                        | 350.13277                        |
| p-cresol |    | 107.05024                        | 342.11584                        | 348.1535                         |
| 2,4-DCP  |    | 160.95564                        | 396.02225                        | 402.05991                        |
| 3,5-DMP  |    | 121.06589                        | 356.13149                        | 362.16915                        |
| o-NP     |   | 138.01967                        | 373.08527                        | 379.12293                        |
| p-NP     |  | 138.01967                        | 373.08527                        | 379.12293                        |
| 4-C-3-MP |  | 141.01127                        | 376.07687                        | 382.11453                        |
| o-CP     |  | 126.99562                        | 362.06122                        | 368.09888                        |
| TCS      |  | 286.94389                        | 522.00949                        | 528.04715                        |
| BPA      |  | 227.10775                        | 695.2244                         | 707.29973                        |
| BPB      |  | 241.12340                        | 709.24005                        | 721.31538                        |
| BPE      |  | 213.09210                        | 681.20875                        | 693.28408                        |

18

**BPF**

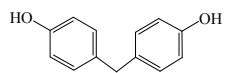

199.07645

667.1931

679.26843

19

**BPZ**

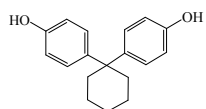

267.13905

735.2557

747.33103

20

21

---

22 Table S2. The linearity ( $R^2$ ) and reproducibility (RSD) for the analysis of spiked pond  
 23 water samples at phenols concentration of 0.05- 20  $\mu\text{g/L}$  except phenol and resorcin.

| Analyte  | $R^2$  | RSD (% , n=3) |      |     |     |     |     |     |
|----------|--------|---------------|------|-----|-----|-----|-----|-----|
|          |        | 0.01          | 0.05 | 0.1 | 1   | 5   | 10  | 20  |
| phenol   | 0.9998 | -             | 4.8  | 5.4 | 3.7 | 6.8 | 9.1 | 7.1 |
| resorcin | 0.9917 | -             | 10.3 | 8.5 | 9.0 | 8.7 | 9.0 | 6.1 |
| p-cresol | 0.9978 | 6.1           | 4.9  | 3.6 | 1.4 | 4.2 | 5.1 | 3.0 |
| 2,4-DCP  | 0.9974 | 4.1           | 3.9  | 5.3 | 2.3 | 3.1 | 5.2 | 2.3 |
| 3,5-DMP  | 0.9979 | 3.9           | 5.6  | 4.2 | 2.5 | 2.8 | 5.1 | 5.5 |
| o-NP     | 0.9926 | 6.5           | 4.9  | 6.2 | 3.9 | 4.2 | 5.0 | 7.6 |
| p-NP     | 0.9914 | 5.3           | 3.6  | 5.3 | 2.1 | 3.5 | 5.2 | 7.5 |
| 4-C-3-MP | 0.9928 | 5.9           | 4.4  | 6.3 | 5.0 | 3.8 | 4.1 | 9.5 |
| o-CP     | 0.9997 | 3.1           | 2.9  | 3.5 | 4.6 | 5.2 | 5.0 | 4.6 |
| TCS      | 0.9976 | 2.8           | 3.0  | 3.8 | 4.1 | 3.6 | 5.0 | 5.1 |
| BPA      | 0.9977 | 5.9           | 5.1  | 5.7 | 2.3 | 4.5 | 5.2 | 6.9 |
| BPB      | 0.9978 | 5.1           | 6.3  | 3.7 | 2.3 | 1.8 | 5.1 | 6.1 |
| BPE      | 0.9983 | 4.2           | 6.1  | 4.7 | 3.6 | 2.2 | 5.1 | 7.1 |
| BPF      | 0.9996 | 4.3           | 5.7  | 2.9 | 6.0 | 3.8 | 5.0 | 6.4 |
| BPZ      | 0.9987 | 6.6           | 4.7  | 5.8 | 3.4 | 4.0 | 5.0 | 5.5 |

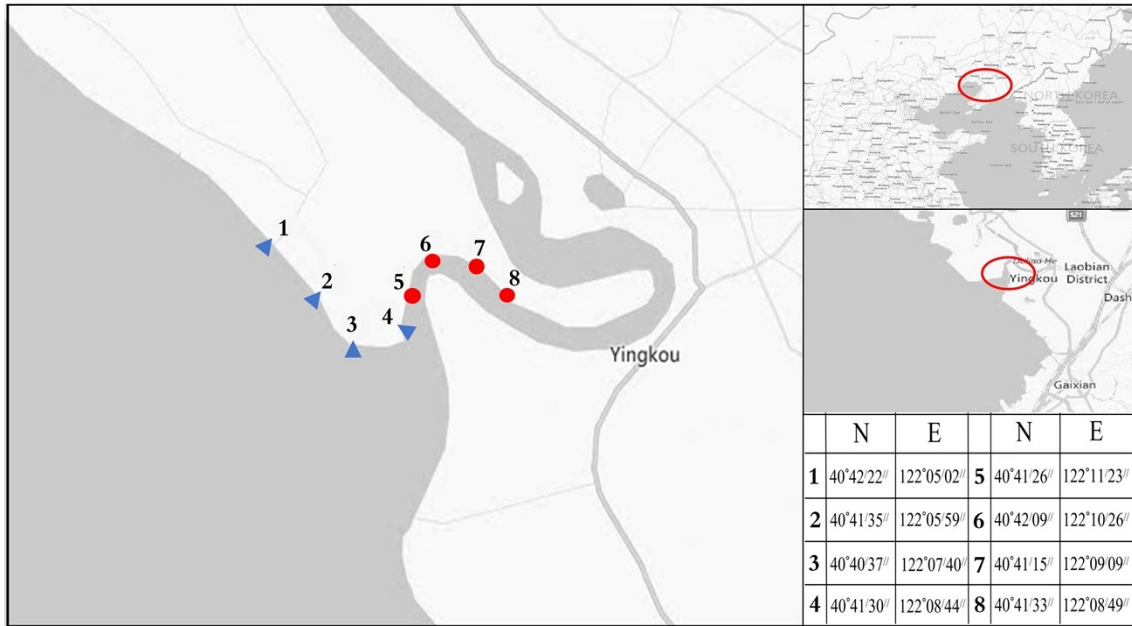

25

26

Fig. S1. Illustration of the sampling sites along the estuary.

27 Adapted from The National Geologic Map Database; U.S. Geological Survey, 2019.

## 28 **Synthesis and characterization of the magnetic materials**

29       The magnetic-HLB for MSPE was synthesized according to our previously reported  
30 method (details were presented in SI).<sup>1-2</sup> In detail, HLB material (0.2 g), FeSO<sub>4</sub> (1.5 g) and  
31 FeCl<sub>3</sub> (1.6 g) were mixed in water (20 mL), and heated to 60 °C. And then, the mixture  
32 was dropwise added into an ammonia solution (45 mL, 3.0 mol/L) and ultrasonicated at 60  
33 °C for 30 min. After reaction, the solution was cooled to room temperature. The resultant  
34 magnetic HLB material (M-HLB) was collected and washed with water repeatedly to  
35 neutral pH, and dried in a vacuum oven at 60 °C. The micro morphologies of HLB and M-  
36 HLB were characterized by scanning electron microscope (SEM), and the elemental  
37 composition was investigated by energy dispersive spectrometry (EDS). The valence state  
38 of Fe was examined by X-ray diffraction (XRD). The specific surface area for both  
39 materials (HLB and M-HLB) was measured by Brunauer-Emmett-Teller (BET).

## 40 **Characterization of the magnetic materials**

41       From the SEM images of M-HLB, it was found that there were considerable amount  
42 of nano-sized particles attached on the micro spheres (Fig. S2). The results from EDS (Fig.  
43 S3) revealed the existence of Fe element in these particles, which were further confirmed  
44 as Fe<sub>3</sub>O<sub>4</sub> by the XRD results (XRD patterns corresponding to the cubic inverse spinel  
45 structure of Fe<sub>3</sub>O<sub>4</sub> at [220], [311], [400], [422], [511], [440] and [533], which were  
46 observed at 30.18°, 35.5°, 43.3°, 53.8°, 57.2°, 62.7° and 74.4°, respectively. Fig. S4). From  
47 the BET analysis results, a lowered specific surface area of 68.848 m<sup>2</sup>/g for M-HLB was  
48 observed (690.5094 m<sup>2</sup>/g for the pristine HLB, Fig. S5), and the pore volume at diameter

49 of <5 nm decreased dramatically, which was owing to the blocking by magnetic particles.<sup>2</sup>

50

51

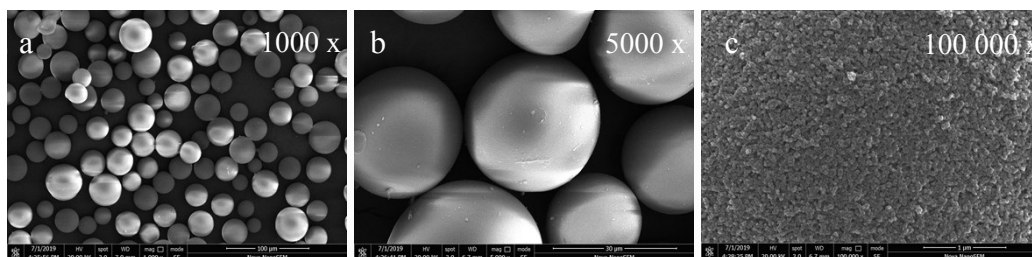

52

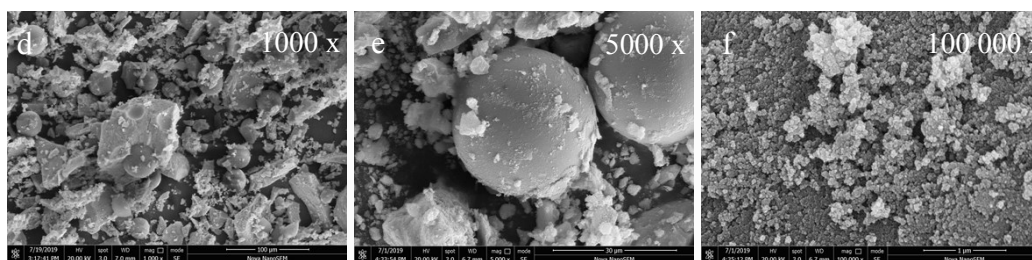

53

54 Fig. S2. SEM images of HLB (a, b, c) and M-HLB (d, e, f) with different magnification.

55

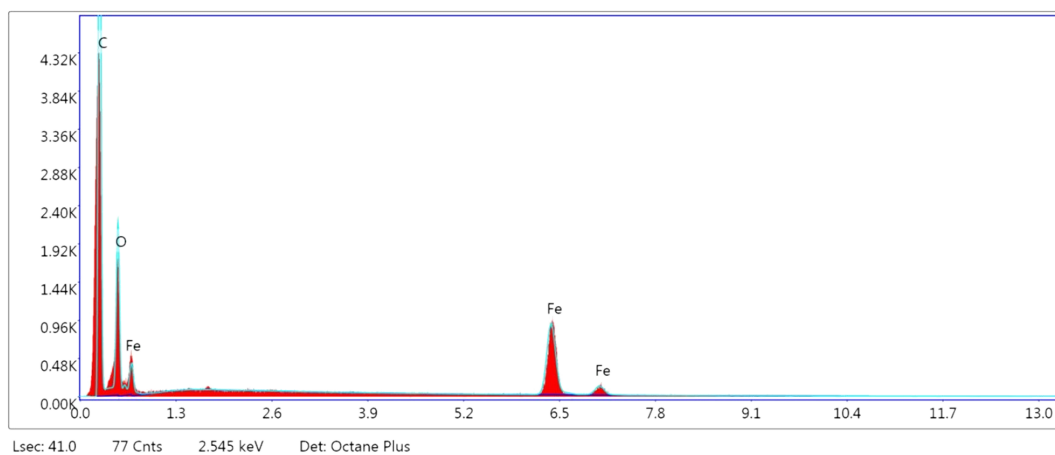

56 Fig. S3. Energy dispersive spectrometry (EDS) analysis of the M-HLB.

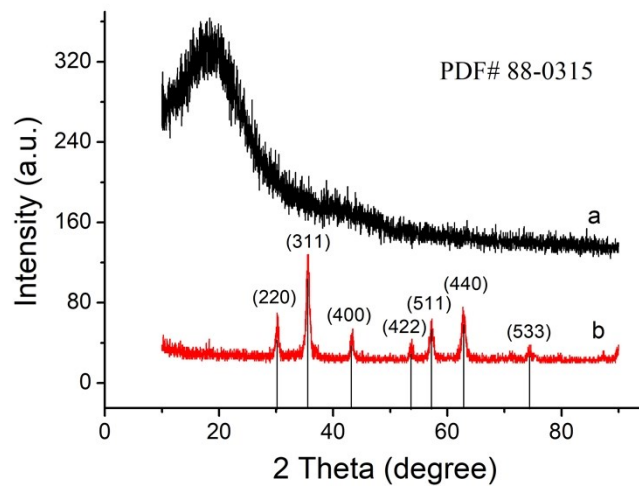

57

58

Fig. S4. X-ray diffraction (XRD) patterns of a) HLB and b) M-HLB.

59

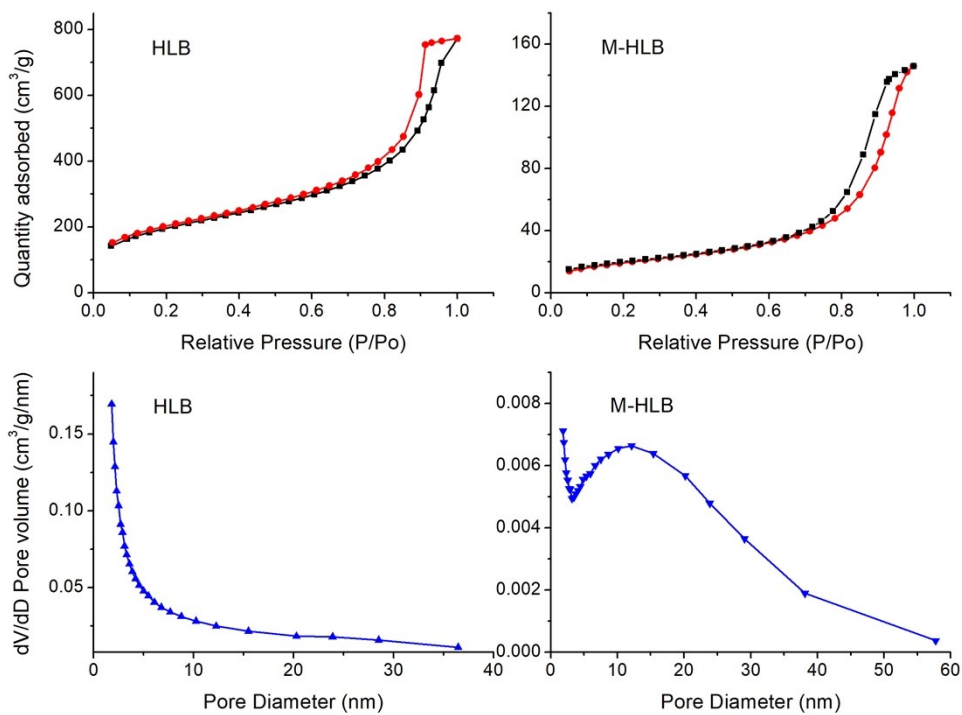

60

61 Fig. S5. The nitrogen adsorption-desorption isotherm and pore size distribution plot of

62

HLB and M-HLB.

63



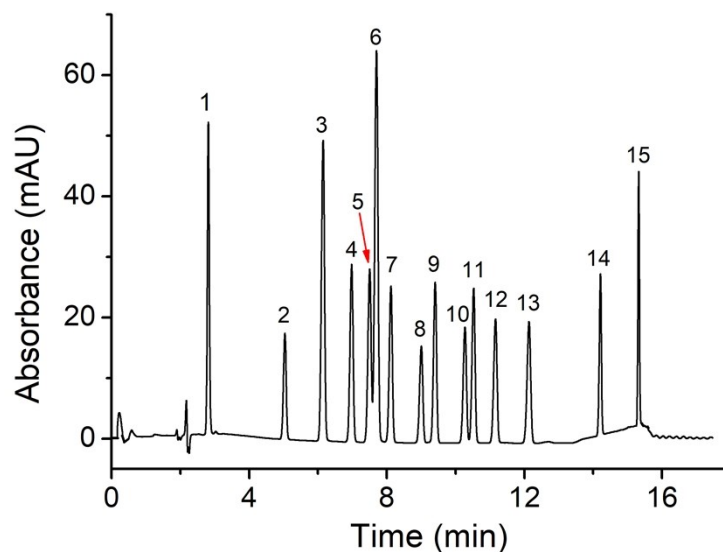

64

65

Fig. S6. Separation of the tested phenols on LC-UV.

66 Analytes: 1) resorcin; 2) phenol; 3) p-NP; 4) p-cresol; 5) BPF; 6) o-CP; 7) o-NP; 8) BPE;  
 67 9) 3,5-DMP; 10) BPA; 11) 4-C-3-MP; 12) 2,4-DCP; 13) BPB; 14) BPZ; 15) TCS. Each at  
 68 15 mg/L.

69 The LC-UV analysis of phenols were performed on a binary pump system equipped  
 70 with an autosampler, a column oven, a C18 (Hypersil BDS, 5  $\mu\text{m}$   $\times$  4.6 mm  $\times$  250 mm)  
 71 and a UV detector (EClassical 3100, Elite, Dalian, China). Mobile phase: A) water  
 72 containing 0.1% FA; B) ACN containing 0.1% FA. LC gradient: 0-6.0 min, 30-50% B;  
 73 6.0-9.0 min, 50-60% B; 9.0-11.0 min, 60% B; 11.0-13.0 min, 60-95% B; 13.0-15.0 min,  
 74 95% B; 15.0-15.1 min, 95-30% B and 15.1-16.0 min, 30% B. Other conditions: flow rate,  
 75 1.5 mL/min; injection volume, 20  $\mu\text{L}$ ; column oven temperature, 50  $^{\circ}\text{C}$ ; detection  
 76 wavelength, 280 nm.

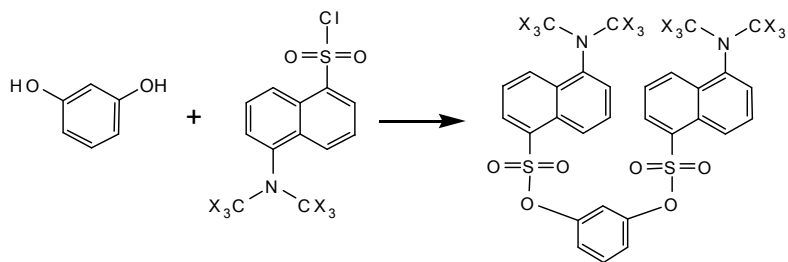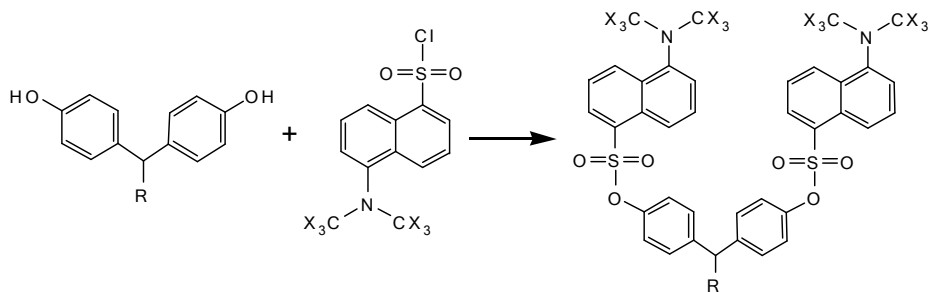

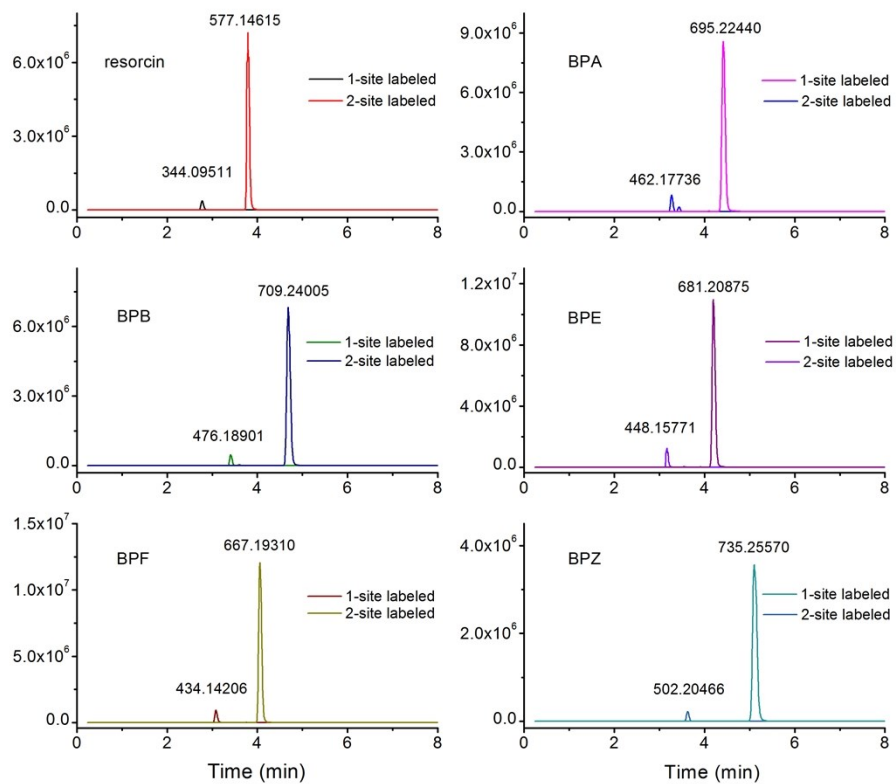

81

82 Fig. S8. The XICs of the dansylated phenols containing two labeling sites.

### 83 Optimization of the MSPE and solid-phase labeling

84 The amount of adsorbent was briefly optimized (15, 30 and 40 mg) with a solution 10  
85 mg/L (10 mL). The residuals of phenols in the solutions after adsorption were analyzed by  
86 LC-UV. As shown in Fig. S9, 30 mg was selected as higher amount (40 mg) provided  
87 limited improvement in adsorption.

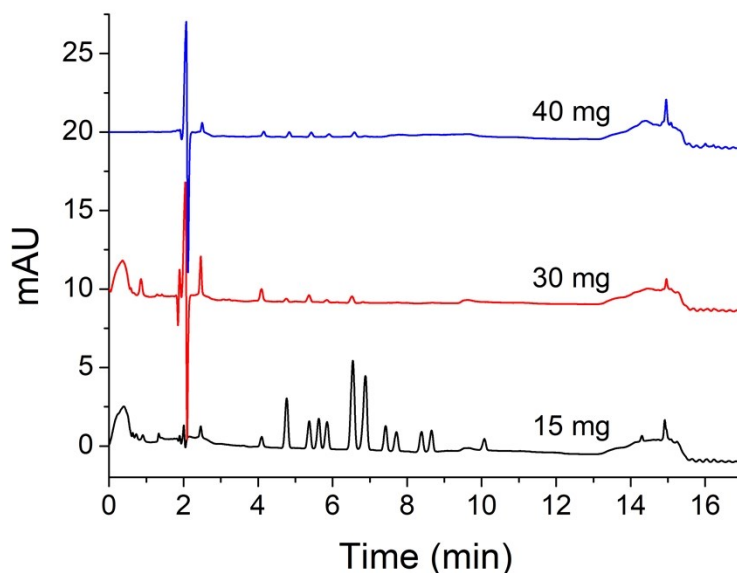

88

89 Fig. S9. The residual of phenols in the solution after adsorption with different amount  
90 of M-HLB in the MSPE.

91 For the optimization of water content in reaction buffer, the ratio of water to ACN  
92 from 3:1-3:3 (v/v) were performed at pH 10.08, Dns-Cl 100 mg/L, temperature 40 °C,  
93 reaction time 60 min. For the optimization amount of Dns-Cl at the concentration from 20  
94 to 100 mg/L were performed at the ratio of water to ACN 1:1 (v/v), pH 10.08, temperature  
95 40 °C and reaction time 60 min. For the optimization reaction temperature, 30 to 70°C were  
96 performed at the ratio of water to ACN 1:1(v/v), Dns-Cl 100 mg/L, pH 10.08, Dns-Cl 100

97 mg/L, and reaction time 60 min. The pH range of 8.77-10.57 were optimized at the ratio  
98 of water to ACN 1:1(v/v), Dns-Cl 100 mg/L, temperature 40 °C, and reaction time 60 min.  
99 The reaction solvent volume from 0.2 to 1.0 mL were tested at the ratio of water to ACN  
100 1:1(v/v), Dns-Cl 100 mg/L, temperature 40 °C, pH 9.72 and reaction time 60 min. The  
101 reaction time from 5 to 60 min were compared at the ratio of water to ACN 1:1(v/v), Dns-Cl  
102 100 mg/L, temperature 40 °C, pH 9.72 and reaction solvent volume 0.2 mL. After reaction,  
103 D6-dansylated phenols were mixed with each reaction solution, and analyzed by LC-  
104 HRMS. The optimization results were evaluated based on the peak area ratios of the D0 to  
105 D6-dansylated phenols.

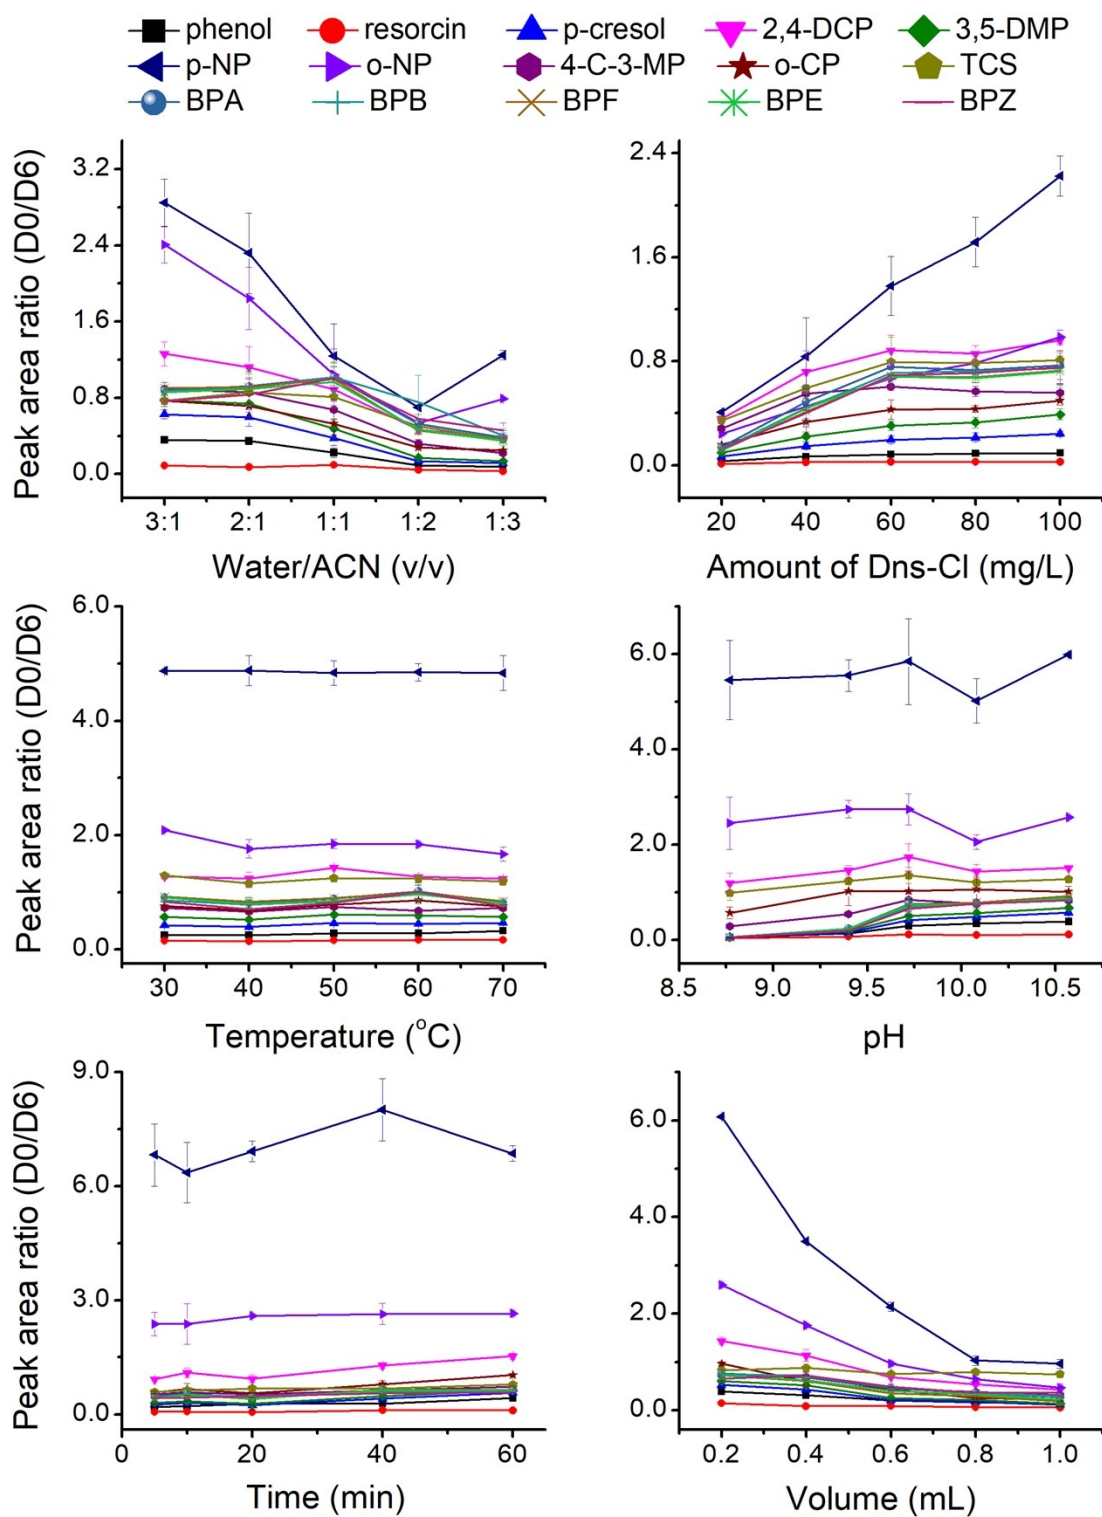

106

107

Fig. S10. Optimization of the solid-phase labeling conditions.

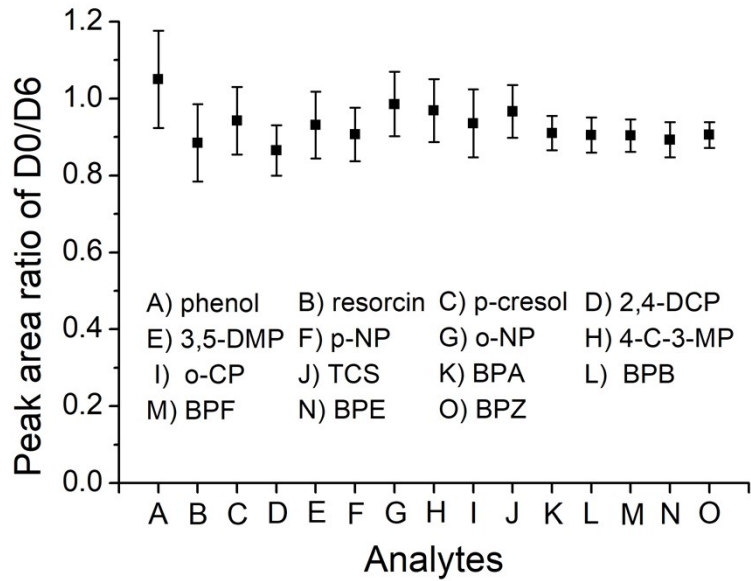

108

109

Fig. S11. Signal-response ratios of D0- to D6-dansylated phenols.

110

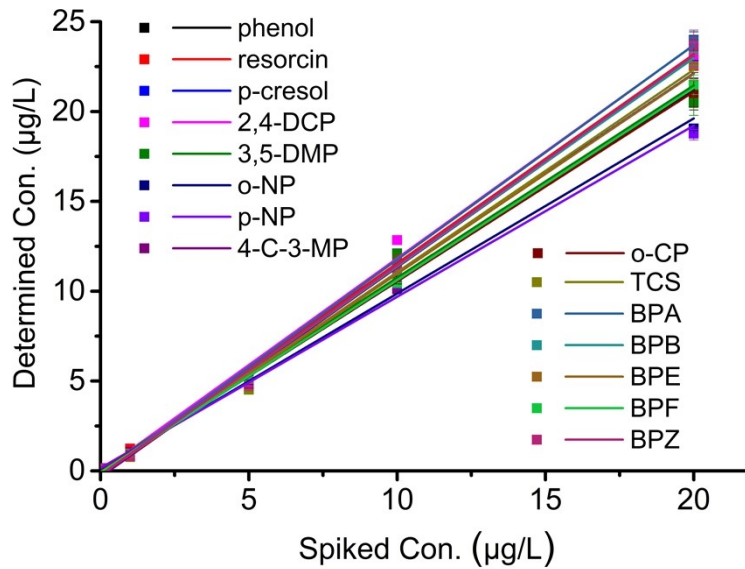

111

112

Fig. S12. Linear quantification curves of the method.

113 Concentration at 0.01-20 µg/L, except phenol and resorcin at 0.05-20 µg/L.

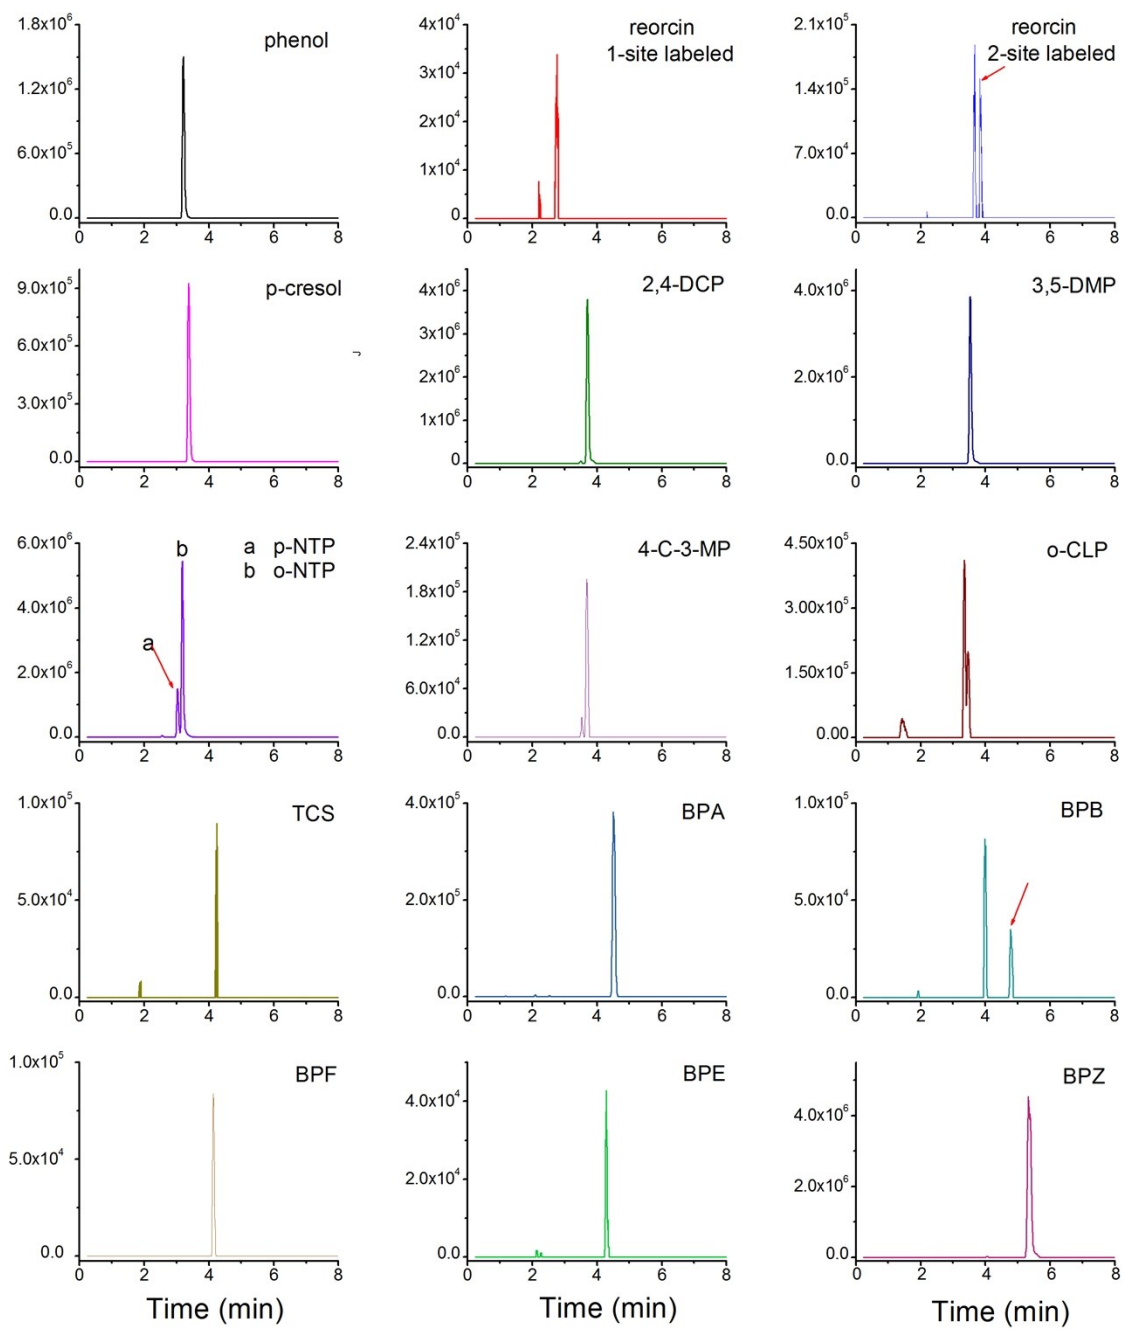



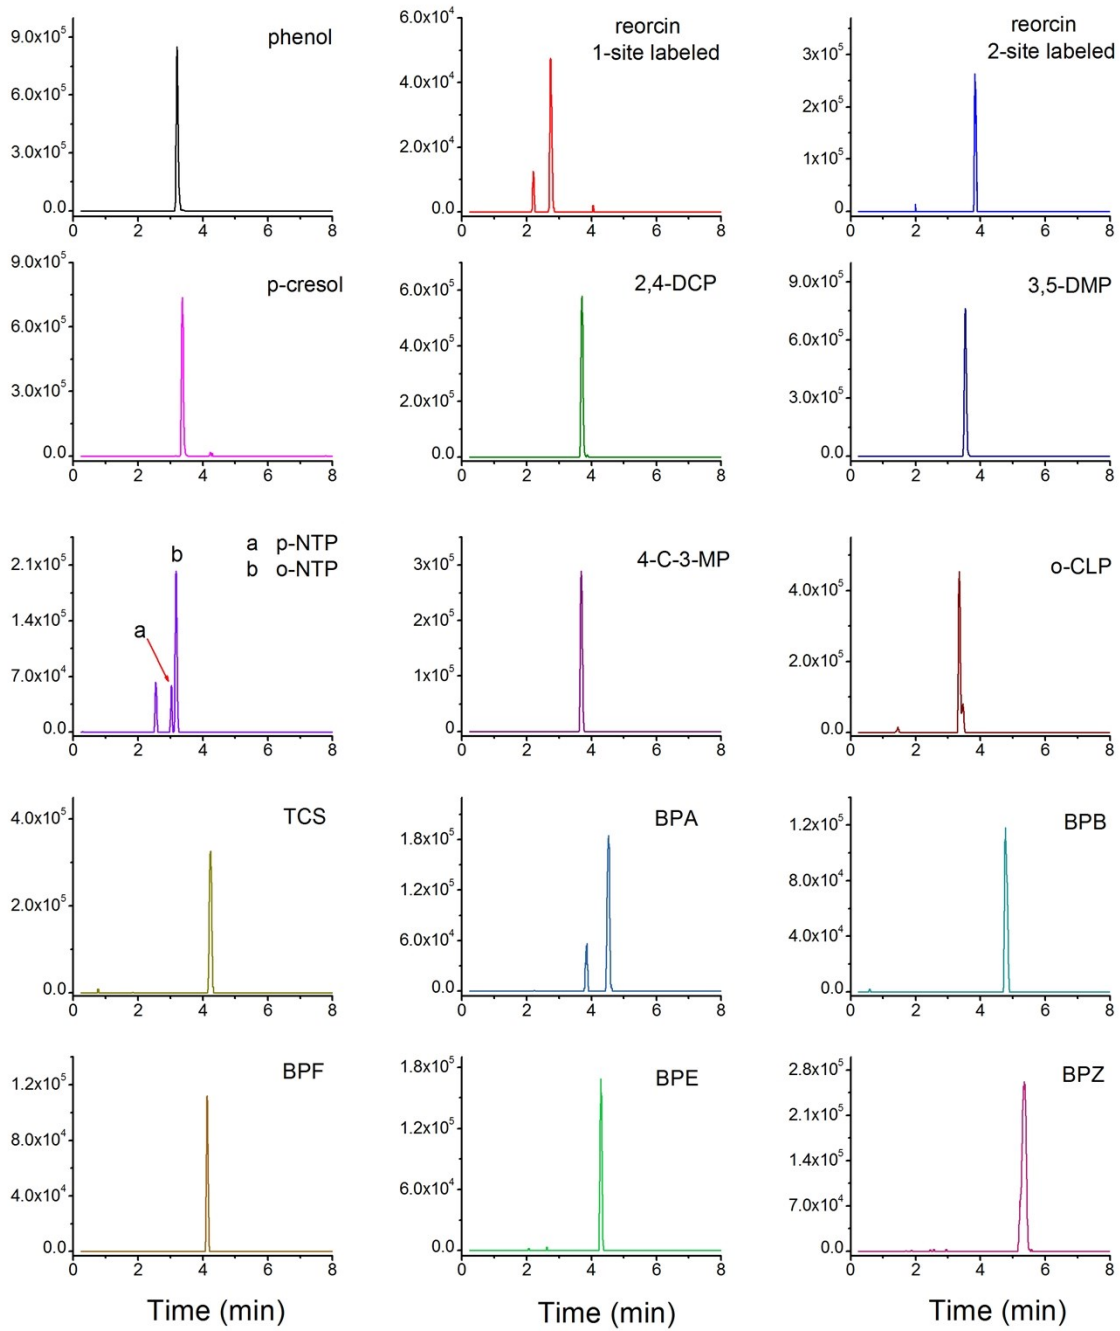

117 Fig. S14. The XICs of phenols determined in the sediment sample (Site 5).

118 **Reference**

- 119 1. L. Fu; H. Zhou; E. M. Miao; S. W. Lu; S. Y. Jing; Y. F. Hu; L. J. Wei; J. J. Zhan; M.  
120 H. Wu, Functionalization of amino terminated carbon nanotubes with isocyanates for  
121 magnetic solid phase extraction of sulfonamides from milk and their subsequent  
122 determination by liquid chromatography-high resolution mass spectrometry. *Food*  
123 *Chem.* **2019**, *289*, 701-707.
- 124 2. E. M. Miao; N. Z. Zhang; S. W. Lu; Y. F. Hu; L. Fu; H. Zhou; J. J. Zhan; M. H. Wu,  
125 Solid phase "on-situ" quadruplex isotope dimethyl labeling for the analysis of  
126 biogenic amines in beers by liquid chromatography-high resolution mass  
127 spectrometry. *J. Chromatogr. A*, **2020**, doi.org/10.1016/j.chroma.2019.460712
